# Supplementary material for: Physiologically‐Based Pharmacokinetic Modeling Analysis for Quantitative Prediction of Renal Transporter–Mediated Interactions Between Metformin and Cimetidine
Source: PubMed Central journal article supplement — CPT Pharmacometrics Syst Pharmacol. 2019 Mar 19;8(6):396–406. doi: 10.1002/psp4.12398 (PMC6617824; doi:10.1002/psp4.12398), 2019-03-19
Supplement: PSP4-8-396-s001.pdf [file PSP4-8-396-s001.pdf]

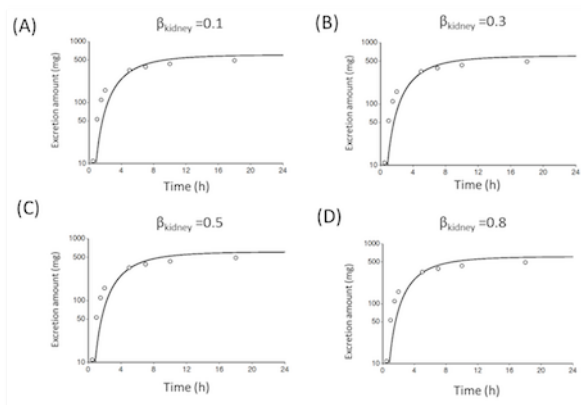

**Figure S1.** Simulated (lines) and observed (open circles) time profiles of metformin urinary excretion after a single oral administration of 1500 mg metformin using various  $\beta_{\text{kidney}}$  values. (A)  $\beta_{\text{kidney}}=0.1$ , (B)  $\beta_{\text{kidney}}=0.3$ , (C)  $\beta_{\text{kidney}}=0.5$ , (D)  $\beta_{\text{kidney}}=0.8$ .
