# Supplementary material for: Physiologically‐Based Pharmacokinetic Modeling Analysis for Quantitative Prediction of Renal Transporter–Mediated Interactions Between Metformin and Cimetidine
Source: PubMed Central journal article supplement — CPT Pharmacometrics Syst Pharmacol. 2019 Mar 19;8(6):396–406. doi: 10.1002/psp4.12398 (PMC6617824; doi:10.1002/psp4.12398), 2019-03-19
Supplement: PSP4-8-396-s002.pdf [file PSP4-8-396-s002.pdf]

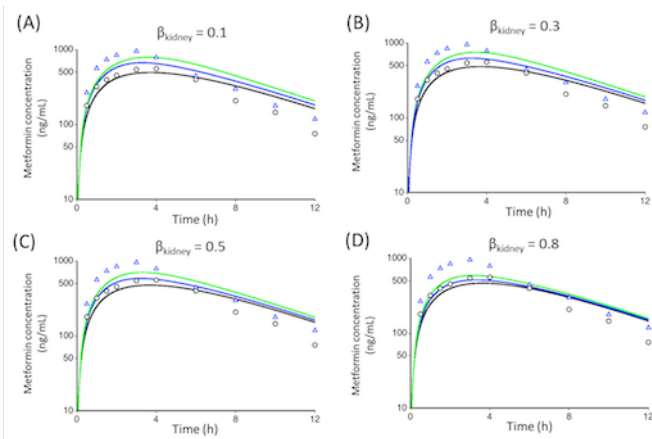

**Figure S2.** Metformin plasma concentration time profiles of control and DDI conditions using the lowest and geometric mean of  $K_i$  values of cimetidine obtained at differing  $\beta_{\text{kidney}}$  values after the administration of 250 mg metformin and 400 mg cimetidine. The  $K_i$  values for OCT1 and OCT2 were set as their respective geometric mean of *in vitro*  $K_i$  values, and  $\beta_{\text{kidney}}$  values were set as 0.1 (A), 0.3 (B), 0.5 (C) or 0.8 (D) for simulation. Black and blue circles represent the observed data under control and DDI conditions, respectively. Lines represent the simulation results of the control condition (black), the DDI condition using the geometric mean (blue) or the lowest (green) value of  $K_i$  values MATEs obtained *in vitro*.
