# Supplementary material for: Physiologically‐Based Pharmacokinetic Modeling Analysis for Quantitative Prediction of Renal Transporter–Mediated Interactions Between Metformin and Cimetidine
Source: PubMed Central journal article supplement — CPT Pharmacometrics Syst Pharmacol. 2019 Mar 19;8(6):396–406. doi: 10.1002/psp4.12398 (PMC6617824; doi:10.1002/psp4.12398), 2019-03-19
Supplement: PSP4-8-396-s003.pdf [file PSP4-8-396-s003.pdf]

**Table S1.** Various parameters used in the metformin PBPK model and reported *in vitro* Km values for transporters of metformin

| Parameters used in the metformin PBPK model |                     |           |  |
|---------------------------------------------|---------------------|-----------|--|
| Parameter (unit)                            | Value               | Reference |  |
| <i>Physicochemical</i>                      |                     |           |  |
| pKa                                         | 12.3                | 1         |  |
| logP                                        | -1.25               | 1         |  |
| <i>Absorption-related</i>                   |                     |           |  |
| FaFg*                                       |                     |           |  |
| 250 mg                                      | 0.84                | 2, 3      |  |
| 1,500 mg                                    | 0.57                | 3         |  |
| <i>Distribution-related</i>                 |                     |           |  |
| $f_{u,met}$                                 | 1                   | 4         |  |
| $K_{p,adipose}$                             | 0.27                | 4         |  |
| $K_{p,muscle}$                              | 2.09                | 4         |  |
| $K_{p,skin}$                                | 1.46                | 4         |  |
| $k_{in,RBC}$ (/h)                           | 0.006               | 5         |  |
| $k_{out,RBC}$ (/h)                          | 0.02                | 5         |  |
| <i>Liver-related</i>                        |                     |           |  |
| membrane potential (mV)                     | - 40                | 6         |  |
| $CL_{int,all}$ (L/h)                        | 10.7**              | 3         |  |
| $R_{dif}$                                   | 0.186               | 7         |  |
| $\beta_{liver}$                             | 0.5 (fixed)**       | -         |  |
| $R_{OCT1, inf/eff}$                         | 1.32                | 8         |  |
| <i>Kidney-related</i>                       |                     |           |  |
| $P_d$ (m/h)                                 | $1.8 \cdot 10^{-5}$ | 9         |  |
| $R_{OCT2, inf/eff}$                         | 1.32                | 8         |  |

*in vitro* Km ( $\mu$ M) values for metformin

| Transporter | geometric mean | range     | Reference  |
|-------------|----------------|-----------|------------|
| OCT1        | 1,470          | 1,470     | 10         |
| OCT2        | 1,178          | 810-1,465 | 10, 11, 12 |
| MATEs       | 740            | 283-1,980 | 13, 14, 15 |

$k_a$ , absorption rate constant;  $k_{trans}$ , transit rate constant;  $FaFg$ , intestinal availability;  $f_{u,met}$ , unbound metformin fraction in plasma;  $K_{p,adipose}$ , adipose/plasma concentration ratio;  $K_{p,muscle}$ , muscle/plasma concentration ratio;  $K_{p,skin}$ , skin/plasma concentration ratio;  $k_{in,RBC}$ , plasma-to-erythrocyte partitioning rate constant;  $k_{out,RBC}$ , erythrocyte-to-plasma partitioning rate constant;  $CL_{int,all}$ , overall hepatic intrinsic clearance;  $R_{dif}$ , passive-to-active clearance ratio;  $R_{OCT1,inf/eff}$ , OCT1 influx-to-efflux clearance ratio;  $CL_{met}$ , hepatic metabolic clearance;  $P_d$ , permeability value;  $R_{OCT2,inf/eff}$ , OCT2 influx-to-efflux clearance ratio

\*:  $FaFg$  was back calculated from bioavailability. Total clearance and hepatic availability was calculated using non-renal clearance in 250 mg i.v. dose study as hepatic clearance assuming non-renal clearance is independent from dose.

\*\* :  $CL_{int,all}$  was calculated from the reported clinical data,<sup>3</sup> and used as fixed. The  $\beta_{liver}$  value was initially set at three different values (0.2, 0.5, and 0.8) in order to obtain the fitted values of  $R_{MATE/dif}$ ,  $k_a$ , and  $k_{trans}$ . However, the optimized values and goodness of the fitting were similar regardless of the  $\beta_{liver}$  value. Thus, the  $\beta_{liver}$  value was set to be 0.5 in subsequent simulations.

#### Reference in Table S1

1. Value from SciFinder®
2. Somogyi, A., Stockley, C., Keal, J., Rolan, P., Bochner, F. Reduction of metformin renal tubular secretion by cimetidine in man. *Br. J. Clin. Pharmacol.* **23**, 545-551 (1987).
3. Tucker, G.T., Casey, C., Phillips, P.J., Connor, H., Ward, J.D., Woods, H.F. Metformin kinetics in healthy subjects and in patients with diabetes mellitus. *Br. J. Clin. Pharmacol.* **12**, 235-246 (1981).
4. Rodgers, T., Leahy, D., Rowland, M. Physiologically based pharmacokinetic modeling 1: predicting the tissue distribution of moderate-to-strong bases. *J. Pharm. Sci.* **94**, 1259–1276 (2005).
5. Xie, F., Ke, A.B., Bowers, G.D., Zamek-Gliszczyński, M.J. Metformin's intrinsic blood-to-plasma partition ratio (B/P): Reconciling the perceived high *in vivo* B/P > 10

with the *in vitro* equilibrium value of unity. *J. Pharmacol. Exp. Ther.* **354**, 225-229 (2015).

6. Saito S., Murakami Y., Miyauchi S., Kamo N. Measurement of plasma membrane potential in isolated rat hepatocytes using the lipophilic cation, tetraphenylphosphonium: correction of probe intracellular binding and mitochondrial accumulation. *Biochim. Biophys. Acta.* **1111**, 221-230 (1992).
7. Sogame Y., Kitamura A., Yabuki M., Komuro S. A Comparison of Uptake of Metformin and Phenformin Mediated by hOCT1 in Human Hepatocytes. *Biopharm. Drug Dispos.* **30**, 476–484 (2009)
8. Chien, H.C. *et al.*, Rapid method to determine intracellular drug concentrations in cellular uptake assays: Application to metformin in organic cation transporter 1-transfected human embryonic kidney 293 cells. *Drug. Metab. Dispos.* **44**, 356-364 (2016).
9. Balimane, P.V., Chong, S. Evaluation of permeability and P-glycoprotein interactions: industry outlook. In *Biopharmaceutics Applications in Drug Development*. (eds. Krishna, R., and Yu, L.) 101-138 (Springer, New York, 2008).
10. Kimura, N., Okuda, M., Inui, K. Metformin transport by renal basolateral organic cation transporter hOCT2. *Pharm Res.* **22**, 255-259 (2005).

11. Chen, L. *et al.*, Role of organic cation transporter 3 (SLC22A3) and its missense variants in the pharmacologic action of metformin. *Pharmacogenet Genomics*. **20**, 687–699 (2010).
12. Shen, H. *et al.*, Cynomolgus Monkey as a Clinically Relevant Model to Study Transport Involving Renal Organic Cation Transporters: In Vitro and In Vivo Evaluation. *Drug Metab Dispos*. **44**, 238-249 (2016).
13. Masuda, S. *et al.*, Identification and functional characterization of a new human kidney-specific H<sup>+</sup>/organic cation antiporter, kidney-specific multidrug and toxin extrusion 2. *J Am Soc Nephrol*. **17**, 2127-2135 (2006).
14. Tanihara Y., Masuda S., Sato T., Katsura T., Ogawa O., Inui K. Substrate specificity of MATE1 and MATE2-K, human multidrug and toxin extrusions/H(+)–organic cation antiporters. *Biochem Pharmacol*. **74**, 359-371 (2007).
15. Yin, J., Duan, H., Wang, J. Impact of substrate-dependent inhibition on renal organic cation transporters hOCT2 and hMATE1/2-K-mediated drug transport and intracellular accumulation. *Pharmacol. Exp. Ther*. **359**, 401-410 (2016).
