# Supplementary material for: Physiologically‐Based Pharmacokinetic Modeling Analysis for Quantitative Prediction of Renal Transporter–Mediated Interactions Between Metformin and Cimetidine
Source: PubMed Central journal article supplement — CPT Pharmacometrics Syst Pharmacol. 2019 Mar 19;8(6):396–406. doi: 10.1002/psp4.12398 (PMC6617824; doi:10.1002/psp4.12398), 2019-03-19
Supplement: PSP4-8-396-s004.pdf [file PSP4-8-396-s004.pdf]

**Table S2.** Physiological parameters of blood volume, tissue volumes, hematocrit value, and blood flows

| Parameter(unit)            | value | Reference |
|----------------------------|-------|-----------|
| $V_{\text{blood}}$ (L)     | 5.20  | 1         |
| $V_{\text{HC}}$ (L)        | 1.22  | 1, 2      |
| $V_{\text{EH}}$ (L)        | 0.469 | 1, 2      |
| $V_{\text{muscle}}$ (L)    | 35.0  | 1         |
| $V_{\text{skin}}$ (L)      | 7.80  | 1         |
| $V_{\text{adipose}}$ (L)   | 10.0  | 1         |
| $V_{\text{r}}$ (L)         | 0.28  | 1         |
| $H_{\text{t}}$             | 0.44  | 1         |
| $Q_{\text{h}}$ (L/h)       | 87.0  | 1         |
| $Q_{\text{muscle}}$ (L/h)  | 45.0  | 1         |
| $Q_{\text{skin}}$ (L/h)    | 18.0  | 1         |
| $Q_{\text{adipose}}$ (L/h) | 15.6  | 1         |

$V_{\text{blood}}$ , blood volume;  $V_{\text{HC}}$ , hepatocyte volume;  $V_{\text{EH}}$ , extrahepatic volume;  $V_{\text{muscle}}$ , muscle volume;  $V_{\text{skin}}$ , skin volume;  $V_{\text{adipose}}$ , adipose volume;  $V_{\text{renal}}$ , kidney volume;  $H_{\text{t}}$ , hematocrit value;  $Q_{\text{h}}$ , liver blood flow rate;  $Q_{\text{muscle}}$ , muscle blood flow rate;  $Q_{\text{skin}}$ , skin blood flow rate;  $Q_{\text{adipose}}$ , adipose blood flow rate.

#### Reference for Table S2

1. Davies B., Morris T. Physiological parameters in laboratory animals and humans. *Pharm. Res.* **10**, 1093-1095 (1993).
2. Kawai R., Mathew D., Tanaka C., Rowland M.. Physiologically based pharmacokinetics of cyclosporine A: extension to tissue distribution kinetics in rats and scale-up to human. *J Pharmacol Exp Ther.* **287**, 457-68 (1998).
