# Supplementary material for: Physiologically‐Based Pharmacokinetic Modeling Analysis for Quantitative Prediction of Renal Transporter–Mediated Interactions Between Metformin and Cimetidine
Source: PubMed Central journal article supplement — CPT Pharmacometrics Syst Pharmacol. 2019 Mar 19;8(6):396–406. doi: 10.1002/psp4.12398 (PMC6617824; doi:10.1002/psp4.12398), 2019-03-19
Supplement: PSP4-8-396-s005.pdf [file PSP4-8-396-s005.pdf]

**Table S3.** Physiological parameters, membrane potential, blood flow, and urinary flow in the kidney model

| Flow rate in the kidney model |                    |
|-------------------------------|--------------------|
| Parameter (unit)              | value              |
| $Q_r$ (L/h)                   | 74.4 <sup>1)</sup> |
| $Q_{\text{vein}}$ (L/h)       | 74.3 <sup>a</sup>  |
| $Q_{\text{GFR}}$ (L/h)        | 7.50 <sup>1)</sup> |
| $Q_{\text{urine}}$ (L/h)      | 0.06 <sup>1)</sup> |

Surface area and membrane potential of each function in the kidney model

| segment         | Surface area (m <sup>2</sup> ) <sup>2)</sup> |       | Membrane potential <sup>b</sup> (mV) |                   |
|-----------------|----------------------------------------------|-------|--------------------------------------|-------------------|
|                 | Vessel                                       | Lumen | Vessel                               | Lumen             |
| Proximal tubule | 0.81                                         | 6.1   | -70 <sup>3)</sup>                    | -60 <sup>3)</sup> |
| Distal tubule   | 0.21                                         | 0.21  | -60 <sup>4)</sup>                    | -50 <sup>4)</sup> |
| Collecting duct | 0.045                                        | 0.045 | -70 <sup>5)</sup>                    | -30 <sup>5)</sup> |

Length, diameter, and volume of each function in the kidney model

| segment         | Length <sup>c</sup>  | Diameter <sup>6)</sup> | Volume <sup>d</sup> (L) |        |        |        |
|-----------------|----------------------|------------------------|-------------------------|--------|--------|--------|
|                 | (*10 <sup>3</sup> m) | (*10 <sup>-5</sup> m)  | total                   | vessel | cell   | lumen  |
| Proximal tubule | 18                   | 6                      | 0.050                   | 0.015  | 0.012  | 0.023  |
| Distal tubule   | 5.5                  | 5                      | 0.0110                  | 0.0033 | 0.0026 | 0.0051 |

|                 |   |    |        |       |       |       |
|-----------------|---|----|--------|-------|-------|-------|
| Collecting duct | 2 | 20 | 0.0063 | 0.019 | 0.015 | 0.029 |
|-----------------|---|----|--------|-------|-------|-------|

---

pHs of different segments in the kidney model

---

|                 | Lumen <sup>8)</sup> | Cell <sup>9)</sup> | Vessel <sup>9)</sup> |
|-----------------|---------------------|--------------------|----------------------|
| Proximal tubule | 7.0                 | 7.2                | 7.4                  |
| Distal tubule   | 6.7                 | 7.2                | 7.4                  |
| Collecting duct | 6.4                 | 7.2                | 7.4                  |

---

$Q_r$ , blood flow rate into the kidney;  $Q_{vein}$ , blood flow rate out of the kidney;  $Q_{GFR}$ , glomerular filtration rate;  $Q_{urine}$ , urine flow rate.

- $Q_{vein}$  was calculated from  $Q_r + (Q_{GFR} - Q_{urine})$
- The membrane potential is inside negative
- The length of the proximal and distal tubules were calculated from the length/nephron<sup>6)</sup> and  $10^6$  nephrons/kidney<sup>7)</sup>. The length of the collecting duct was calculated from the average length of the collecting duct<sup>6)</sup>, 11 nephrons/collecting duct<sup>10)</sup> and  $10^6$  nephrons/kidney<sup>7)</sup>.
- The volumes of each lumen were calculated from the diameter and the length. Blood vessel volumes were calculated from the total volume of each section and the fraction of tissue vasculature<sup>11)</sup>. Cell volumes were calculated by subtracting the lumen and vessel volumes from the total volume of the individual segments.

Reference for Table S3

- Davies B., Morris T. Physiological parameters in laboratory animals and humans. *Pharm. Res.* **10**, 1093-1095 (1993).
- Scotcher D, Jones C, Rostami-Hodjegan A, Galetin A Novel minimal physiologically-based model for the prediction of passive tubular reabsorption and renal excretion clearance. *Eur. J. Pharm. Sci.* **30**, 59-71 (2016)
- Motohashi H., Inui K. Organic cation transporter OCTs (SLC22) and MATEs (SLC47) in the human kidney. *AAPS J.* **15**, 581-588 (2013).
- Wright F.S. Increasing magnitude of electrical potential along the renal distal tubule. *Am J Physiol.* **220**, 624-38 (1971).
- Moczydlowski, G. Electrophysiology of the Cell Membrane. In *Medical physiology: a*

*cellular and molecular approach.* (eds. Boron, F. and Boulpaep, L.) 147-178, (Saunders, Philadelphia, 2012).

6. Pitts R.F., *Physiology of the Kidney and Body Fluids* 3rd edn. (Year Book, Chicago, 1974)
7. Zimanyi M,A., Hoy W.E., Douglas-Denton R.N., Hughson M.D., Holden L.M., Bertram J.F. Nephron number and individual glomerular volumes in male Caucasian and African American subjects. *Nephrol Dial Transplant.* **24**, 2428-2433 (2009).
8. Siener R., Jahnen A., Hesse A. Influence of a mineral water rich in calcium, magnesium and bicarbonate on urine composition and the risk of calcium oxalate crystallization. *Eur J Clin Nutr.* **58**,270-276 (2004).
9. Yoshikado, T. *et al.*, Quantitative analyses of hepatic OATP-mediated interactions between statins and inhibitors using PBPK modeling with a parameter optimization method. *Clin. Pharmacol. Ther.* **100**, 513-523 (2016).
10. Seldin D.W., Giebisch G. *The Kidney: Physiology and Pathophysiology*, 3rd edn., (Lippincott Williams & Wilkins, Philadelphia, 2000)
11. Kawai R., Mathew D., Tanaka C., Rowland M.. Physiologically based pharmacokinetics of cyclosporine A: extension to tissue distribution kinetics in rats and scale-up to human. *J Pharmacol Exp Ther.* **287**, 457-68 (1998).
