# Supplementary material for: Physiologically‐Based Pharmacokinetic Modeling Analysis for Quantitative Prediction of Renal Transporter–Mediated Interactions Between Metformin and Cimetidine
Source: PubMed Central journal article supplement — CPT Pharmacometrics Syst Pharmacol. 2019 Mar 19;8(6):396–406. doi: 10.1002/psp4.12398 (PMC6617824; doi:10.1002/psp4.12398), 2019-03-19
Supplement: PSP4-8-396-s006.pdf [file PSP4-8-396-s006.pdf]

**Table S4** Parameters used in the cimetidine PBPK model

| Parameter (unit)               | Value               | Reference |
|--------------------------------|---------------------|-----------|
| Physicochemical                |                     |           |
| pKa                            | 6.9                 | 1         |
| logP                           | 0.48                | 1         |
| Absorption-related             |                     |           |
| $k_a$ (/h)                     | 0.70                | 1         |
| $T_{lag}$ (h)                  | 0.15                | 1         |
| FaFg                           | 0.92                | 1         |
| Distribution-related           |                     |           |
| $f_{u,cim}$                    | 0.80                | 1         |
| $R_b$                          | 0.97                | 1         |
| $K_{p,adipose}$                | 0.24                | 1         |
| $K_{p,muscle}$                 | 0.86                | 1         |
| $K_{p,skin}$                   | 0.72                | 1         |
| Liver-related                  |                     |           |
| $PS_{act}$ (L/h)               | 12.0                | 2         |
| $R_{dif}$                      | 1.16                | 2         |
| $CL_{met}$ (L/h)               | 11.3                | 1         |
| Kidney-related                 |                     |           |
| $P_d$ (m/h)                    | $7.9 \cdot 10^{-5}$ | 3         |
| $\lambda$                      | 0.1                 | 4         |
| $K_{m,OCT2}$ ( $\mu$ M)        | 72.6                | 1         |
| $V_{max,OCT2}$ ( $\mu$ mol/h)* | 7265                | 1         |
| $R_{OCT2,inf/eff}$             | 1.32                | 5         |
| $K_{m,OAT3}$ ( $\mu$ M)        | 161                 | 1         |
| $V_{max,OAT3}$ ( $\mu$ mol/h)* | 4124                | 1         |
| $K_{m,MATE}$ ( $\mu$ M)        | 7.7                 | 1         |
| $V_{max,MATE}$ ( $\mu$ mol/h)* | 453                 | 1         |

$k_a$ , absorption rate constant;  $T_{lag}$ , intestinal absorption lag time; FaFg, intestinal availability;  $f_{u,cim}$ , unbound fraction in plasma;  $K_{p,adipose}$ , adipose/blood concentration ratio;  $K_{p,muscle}$ , muscle/blood concentration ratio;  $K_{p,skin}$ , skin/blood concentration ratio;  $P_d$ , permeability value;  $\lambda$ , the ratio of passive diffusion for an ionized form to that for an unionized form;  $PS_{OCT2}$ , clearance by OCT2;  $R_{OCT2,inf/eff}$ , OCT2-mediated influx-to-efflux clearance ratio;  $PS_{OAT3}$ , clearance by OAT3;  $PS_{MATE}$ , clearance by MATEs;  $PS_{act}$ , hepatic active clearance;  $R_{dif}$ ,

*passive-to-active clearance ratio;  $CL_{met}$ , hepatic metabolic clearance;*

*\*: Value were calculated from Burt et al., 2016 including RAF.*

Reference for Supplemental Table 4

1. Burt, H.J. *et al.*, Metformin and cimetidine: Physiologically based pharmacokinetic modelling to investigate transporter mediated drug-drug interactions. *Eur. J. Pharm. Sci.* **88**, 70-82 (2016).
2. Umehara, K.I., Iwatsubo, T., Noguchi, K., Kamimura, H. Functional involvement of organic cation transporter1 (OCT1/Oct1) in the hepatic uptake of organic cations in humans and rats. *Xenobiotica.* **37**, 818-831 (2007).
3. Balimane, P.V., Chong, S. Evaluation of permeability and P-glycoprotein interactions: industry outlook. In *Biopharmaceutics Applications in Drug Development.* (eds. Krishna, R., and Yu, L.) 101-138 (Springer, New York, 2008).
4. Yoshikado, T., *et al.*, Comparison of Methods for Estimating Unbound Intracellular-to-Medium Concentration Ratios in Rat and Human Hepatocytes Using Statins. *Drug. Metab. Dispos.* **45**, 779-789 (2017).
5. Chien, H.C. *et al.*, Rapid method to determine intracellular drug concentrations in cellular uptake assays: Application to metformin in organic cation transporter 1-transfected human embryonic kidney 293 cells. *Drug. Metab. Dispos.* **44**, 356-364 (2016).
