# Supplementary material for: Physiologically‐Based Pharmacokinetic Modeling Analysis for Quantitative Prediction of Renal Transporter–Mediated Interactions Between Metformin and Cimetidine
Source: PubMed Central journal article supplement — CPT Pharmacometrics Syst Pharmacol. 2019 Mar 19;8(6):396–406. doi: 10.1002/psp4.12398 (PMC6617824; doi:10.1002/psp4.12398), 2019-03-19
Supplement: PSP4-8-396-s008.pdf [file PSP4-8-396-s008.pdf]

## Model equations for metformin

### Central plasma compartment

$$V_{\text{plasma}} \cdot \frac{dC_{\text{plasma}}}{dt} = Q_{h,p} \cdot C_{EH,p,5} + Q_{r,p,6} \cdot C_{CD,p} + k_{\text{out}} \cdot V_{\text{erythro}} \cdot C_{\text{erythro}} - Q_{h,p} \cdot C_{\text{plasma}} - Q_{r,p} \cdot C_{\text{plasma}} -$$

$$Q_{\text{muscle},p} \cdot (C_{\text{plasma}} - C_{\text{muscle},p}/K_{p,\text{muscle}}) -$$

$$Q_{\text{skin},p} \cdot (C_{\text{plasma}} - C_{\text{skin},p}/K_{p,\text{skin}}) - Q_{\text{adipose},p} \cdot (C_{\text{plasma}} - C_{\text{adipose},p}/K_{p,\text{adipose}}) - k_{\text{in}} \cdot V_{\text{plasma}} \cdot C_{\text{plasma}}$$

### Central erythrocyte compartment

$$V_{\text{erythro}} \cdot \frac{dC_{\text{erythro}}}{dt}$$

$$= Q_{h,e} \cdot C_{EH,e,5} + Q_{r,e,6} \cdot C_{CD,e} + k_{\text{in}} \cdot V_{\text{plasma}} \cdot C_{\text{plasma}} - Q_{h,e} \cdot C_{EH,e,1} - Q_{re} \cdot C_{\text{erythro}} - Q_{\text{muscle},e} \cdot (C_{\text{erythro}} - C_{\text{muscle},e})$$

$$- Q_{\text{skin},e} \cdot (C_{\text{plasma}} - C_{\text{skin},e}) - Q_{\text{adipose},e} \cdot (C_{\text{plasma}} - C_{\text{adipose},e}) - k_{\text{out}} \cdot V_{\text{erythro}} \cdot C_{\text{erythro}}$$

### Distribution compartments

$$V_{\text{muscle},p} \cdot \frac{dC_{\text{muscle},p}}{dt} = (Q_{\text{muscle},p} \cdot C_{\text{plasma}} + k_{\text{out}} \cdot V_{\text{muscle},e} \cdot C_{\text{muscle},e} - k_{\text{in}} \cdot V_{\text{muscle},p} \cdot C_{\text{muscle},p}/K_{p,\text{muscle}}$$

$$- Q_{\text{muscle},p} \cdot C_{\text{muscle},p}/K_{p,\text{muscle}})$$

$$V_{\text{muscle},e} \cdot \frac{dC_{\text{muscle},e}}{dt} = (Q_{\text{muscle},e} \cdot C_{\text{erythro}} + k_{\text{in}} \cdot V_{\text{muscle},p} \cdot C_{\text{muscle},p}/K_{p,\text{muscle}} - k_{\text{out}} \cdot V_{\text{muscle},e} \cdot C_{\text{muscle},e}$$

$$- Q_{\text{muscle},e} * C_{\text{muscle},e})$$

$$V_{\text{skin},p} * dtC_{\text{skin},p}/dt = (Q_{\text{skin},p} * C_{\text{plasma}} + k_{\text{out}} * V_{\text{skin},e} * C_{\text{skin},e} - k_{\text{in}} * V_{\text{skin},p} * C_{\text{skin},p}/K_{p,\text{skin}} -$$

$$Q_{\text{skin},p} * C_{\text{skin},p}/K_{p,\text{skin}})$$

$$V_{\text{skin},e} * dtC_{\text{skin},e}/dt = (Q_{\text{skin},e} * C_{\text{erythro}} + k_{\text{in}} * V_{\text{skin},p} * C_{\text{skin},p}/K_{p,\text{skin}} - k_{\text{out}} * V_{\text{skin},e} * C_{\text{skin},e} - Q_{\text{skin},e} * C_{\text{skin},e})$$

$$V_{\text{adipose},p} * dtC_{\text{adipose},p}/dt = (Q_{\text{adipose},p} * C_{\text{plasma}} + k_{\text{out}} * V_{\text{adipose},e} * C_{\text{adipose},e} -$$

$$k_{\text{in}} * V_{\text{adipose},p} * C_{\text{adipose},p}/K_{p,\text{adipose}} - Q_{\text{adipose},p} * C_{\text{adipose},p}/K_{p,\text{adipose}})$$

$$V_{\text{adipose},e} * dtC_{\text{adipose},e}/dt = (Q_{\text{adipose},e} * C_{\text{erythro}} + k_{\text{in}} * V_{\text{adipose},p} * C_{\text{adipose},p}/K_{p,\text{adipose}} -$$

$$k_{\text{out}} * V_{\text{adipose},e} * C_{\text{adipose},e} - Q_{\text{adipose},e} * C_{\text{adipose},e})$$

### Intestinal compartments (i=1~3)

$$dX_{\text{intestine},1} / dt = k_{\text{trans}} * X_{\text{transit}} - ka * X_{\text{intestine},1} - ka * (1-\text{FaFg})^{1/3} / (1-(1-\text{FaFg})^{1/3}) * X_{\text{intestine},1}$$

$$dX_{\text{intestine},2} / dt = ka * (1-\text{FaFg})^{1/3} / (1-(1-\text{FaFg})^{1/3}) * X_{\text{intestine},1} - ka * X_{\text{intestine},2} -$$

$$ka * (1-\text{FaFg})^{1/3} / (1-(1-\text{FaFg})^{1/3}) * X_{\text{intestine},2}$$

$$dX_{\text{intestine},3} / dt = ka * (1-\text{FaFg})^{1/3} / (1-(1-\text{FaFg})^{1/3}) * X_{\text{intestine},2} - ka * X_{\text{intestine},3} -$$

$$ka * (1-\text{FaFg})^{1/3} / (1-(1-\text{FaFg})^{1/3}) * X_{\text{intestine},3}$$

## Transit compartment

$$dX_{\text{transit}} / dt = -k_{\text{trans}} * X_{\text{transit}}$$

## Extracellular hepatic compartments of metformin without the coadministration of inhibitors (i = 1~5)

$$(V_{\text{EH},p} / 5) * dC_{\text{EH},p,i} / dt = k_a * (X_{\text{intestine},1} + X_{\text{intestine},2} + X_{\text{intestine},3}) + Q_{\text{h},p} * (C_{\text{plasma}} - C_{\text{EH},p,i}) + k_{\text{out}} * (V_{\text{EH},e} / 5) * C_{\text{EH},e,i} + f_h * (PS_{\text{dif},\text{eff}} / 5) * C_{\text{HC},i} - (V_{\text{max\_met\_OCT1}} * (C_{\text{EH},p,i} / (K_{\text{m\_met\_OCT1}} + C_{\text{EH},p,i})) - C_{\text{HC},i} * e^{\text{Nh}} / R_{\text{OCT1},\text{inf}/\text{eff}} / (K_{\text{m\_met\_OCT1}} + C_{\text{HC},i})) / 5 - f_u * (PS_{\text{dif},\text{inf}} / 5) * C_{\text{EH},p,i} - k_{\text{in}} * (V_{\text{EH},p,i} / 5) * C_{\text{EH},p,i}; (i = 1)$$

$$(V_{\text{EH},p} / 5) * dC_{\text{EH},p,i} / dt = Q_{\text{h},p} * (C_{\text{plasma}} - C_{\text{EH},p,i}) + k_{\text{out}} * (V_{\text{EH},e} / 5) * C_{\text{EH},e,i} + f_h * (PS_{\text{dif},\text{eff}} / 5) * C_{\text{HC},i} - (V_{\text{max\_met\_OCT1}} * (C_{\text{EH},p,i} / (K_{\text{m\_met\_OCT1}} + C_{\text{EH},p,i})) - C_{\text{HC},i} * e^{\text{Nh}} / R_{\text{OCT1},\text{inf}/\text{eff}} / (K_{\text{m\_met\_OCT1}} + C_{\text{HC},i})) / 5 - f_u * (PS_{\text{dif},\text{inf}} / 5) * C_{\text{EH},p,i} - k_{\text{in}} * (V_{\text{EH},p,i} / 5) * C_{\text{EH},p,i}; (i = 2~5)$$

$$(V_{\text{EH},e} / 5) * dC_{\text{EH},p,i} / dt = Q_{\text{he}} * (C_{\text{erythro}} - C_{\text{EH},e,i}) + k_{\text{in}} * (V_{\text{EH},p,i} / 5) * C_{\text{EH},p,i} - k_{\text{out}} * (V_{\text{EH},e} / 5) * C_{\text{EH},e,i}; (i=1~5)$$

## Hepatocyte compartments of metformin without the coadministration of inhibitors (i =

1~5)

$$(V_{HC,i} / 5) * dC_{HC,i} / dt = (V_{max\_met\_OCT1} * (C_{EH,p,i} / (K_{m\_met\_OCT1} + C_{EH,p,i})) - C_{HC,i}$$

$$* e^{N_h} / R_{OCT1,inf/eff} / (K_{m\_met\_OCT1} + C_{HC,i}) / 5 + fu * (PS_{dif,inf} / 5) * C_{EH,p,i} - fh * (PS_{dif,eff} / 5) * C_{HC,i} -$$

$$fh * CL_{int,met} * C_{HC,i}; (i=1\sim5)$$

## Extra glomerulus compartment

$$V_{G,p} * dC_{G,p} / dt = Q_{r,p} * C_{plasma} + k_{out} * V_{G,e} * C_{G,e} - Q_{r,p,1} * C_{G,p} - Q_{u1} * C_{G,p} - k_{in} * V_{G,p} * C_{G,p}$$

$$V_{G,e} * dC_{G,e} / dt = Q_{r,e} * C_{erythro} + k_{in} * V_{G,p} * C_{G,p} - Q_{r,e,1} * C_{G,e} - k_{out} * V_{G,e} * C_{G,e}$$

## Glomerulus compartment

$$V_{G,u} * dC_{G,u} / dt = Q_{GFR} * (fu * C_{G,p} - C_{G,u})$$

## Kidney: Proximal tubule (i=1~3)

$$(V_{PT,p}/3) * dC_{PT,p,1}/dt = Q_{r,p,1} * C_{G,p} + fc * 1/3 * PS_{r,PT,difeff} * C_{PT,cell,1} + k_{out} * (V_{PT,e}/3) * C_{PT,e,1} -$$

$$fb * 1/3 * V_{max\_OCT2} * (C_{PT,p,1}/(K_{m\_OCT2} + C_{PT,p,1}) - C_{PT,cell,1} * \exp(Nvpt)/R_{OCT2,inf/eff}/(K_{m\_OCT2} + C_{PT,cell,1})) - fb * 1/3 * PS_{r,PT,difinf} * C_{PT,r,1} - Q_{r,p,2} * C_{PT,p,r,1} - k_{in} * (V_{PT,p}/3) * C_{PT,p,1}$$

$$(V_{PT,e}/3) * dC_{PT,e,1}/dt = Q_{r,e,1} * C_{G,e} + k_{in} * (V_{PT,p}/3) * C_{PT,p,1} - Q_{r,e,2} * C_{PT,e,1} - k_{out} * (V_{PT,e}/3) * C_{PT,e,1}$$

$$(V_{PT,p}/3) * dC_{PT,cell,1}/dt = fb * 1/3 * V_{max\_OCT2} * (C_{PT,p,1}/(K_{m\_OCT2} + C_{PT,p,1}) -$$

$$C_{PT,cell,1} * \exp(Nvpt)/R_{OCT2,inf/eff}/(K_{m\_OCT2} + C_{PT,cell,1})) + fb * 1/3 * PS_{r,PT,difinf} * C_{PT,p,1} +$$

$$fu * 1/3 * PS_{u,PT,difinf} * C_{PT,u,1} - fc * 1/3 * PS_{r,PT,difeff} * C_{PT,cell,1} - fc * 1/3 * (V_{max,MATE}/(K_{m,MATE} + C_{PT,cell,1})) +$$

$$PS_{u,PT,difeff} * C_{PT,cell,1}$$

$$(V_{PT,u}/3) * dC_{PT,u,1}/dt = Q_{u1} * C_{PT,cell,1} + fc * 1/3 * (V_{max,MATE}/(K_{m,MATE} + C_{PT,cell,1})) +$$

$$PS_{u,PT,difeff} * C_{PT,cell,1} - fu * 1/3 * PS_{u,PT,difinf} * C_{PT,u,1} - Q_{u2} * C_{PT,u,1}$$

(i=1)

$$(V_{PT,p}/3) * dC_{PT,p,i}/dt = Q_{r,p,i} * C_{PT,p,(i-1)} + fc * 1/3 * PS_{r,PT,difeff} * C_{PT,cell,i} + k_{out} * (V_{PT,e}/3) * C_{PT,e,i} -$$

$$fb * 1/3 * V_{max\_OCT2} * (C_{PT,p,i}/(K_{m\_OCT2} + C_{PT,p,i}) - C_{PT,cell,i} * \exp(Nvpt)/R_{OCT2,inf/eff}/(K_{m\_OCT2} + C_{PT,cell,i}))$$

$$- fb * 1/3 * PS_{r,PT,difinf} * C_{PT,p,i} - Q_{r,p,(i+1)} * C_{PT,p,i} - k_{in} * (V_{PT,p}/3) * C_{PT,p,i}$$

$$(V_{PT,e}/3) * dC_{PT,e,i}/dt = Q_{r,e,i} * C_{PT,e,(i-1)} + k_{in} * (V_{PT,p}/3) * C_{PT,p,i} - Q_{r,e,2} * C_{PT,e,i} - k_{out} * (V_{PT,e}/3) * C_{PT,e,i}$$

$$(V_{PT,e}/3) * dC_{PT,cell,i}/dt = fb * 1/3 * V_{max\_OCT2} * (C_{PT,p,i} / (K_{m\_OCT2} + C_{PT,p,i})) -$$

$$C_{PT,cell,i} * \exp(Nvpt) / R_{OCT2,inf/eff} / (K_{m\_OCT2} + C_{PT,cell,i}) + fb * 1/3 * PS_{r,PT,difinf} * C_{PT,p,i} +$$

$$fu * 1/3 * PS_{u,PT,difinf} * C_{PT,u,i} - fc * 1/3 * PS_{r,PT,difeff} * C_{PT,cell,i} - fc * 1/3 * (V_{max,MATE} / (K_{m,MATE} + C_{PT,cell,i})) +$$

$$PS_{u,PT,difeff} * C_{PT,cell,i}$$

$$(V_{PT,u}/3) * dC_{PT,u,i}/dt = Q_{u1} * C_{PT,cell,i} + fc * 1/3 * (V_{max,MATE} / (K_{m,MATE} + C_{PT,cell,i})) + PS_{u,PT,difeff} * C_{PT,cell,i}$$

$$- fu * 1/3 * PS_{u,PT,difinf} * C_{PT,u,i} - Q_{u2} * C_{PT,u,i}$$

$$(i=2, 3)$$

### Distal tubule compartment

$$V_{DT,p} * dC_{DT,p}/dt = Q_{r,p,4} * C_{PT,p,3} + fc * PS_{r,dt,difeff} * C_{DT,cell} + k_{out} * V_{DT,e} * C_{DT,e} - fb * PS_{r,DT,difinf} * C_{DT,p} -$$

$$Q_{r,p,5} * C_{DT,p} - k_{in} * V_{DT,p} * C_{DT,p}$$

$$V_{DT,e} * dC_{DT,e}/dt = Q_{r,e,4} * C_{PT,e,3} + k_{in} * V_{DT,p} * C_{DT,p} - Q_{r,e,5} * C_{DT,e} - k_{out} * V_{DT,e} * C_{DT,e}$$

$$V_{DT,cell} * dC_{DT,cell}/dt = fb * PS_{r,DT,difinf} * C_{dt,p} + fu * PS_{u,DT,difinf} * C_{DT,u} - fc * PS_{r,DT,difeff} * C_{DT,cell} -$$

$$fc * PS_{u,DT,difeff} * C_{DT,cell}$$

$$V_{DT,u} * dC_{DT,u}/dt = Q_{u,4} * C_{PT,u,3} + fc * PS_{u,DT,difeff} * C_{DT,cell} - fu * PS_{u,DT,difinf} * C_{DT,u} - Q_{u,5} * C_{DT,u}$$

## Collecting duct compartment

$$V_{CD,p} * dC_{CD,p} / dt = Q_{r,p,5} * C_{dt,p} + fc * PS_{r,CD,difeff} * C_{CD,cell} + k_{out} * V_{CD,e} * C_{CD,e} - fb * PS_{r,CD,difinf} * C_{CD,p} -$$

$$Q_{r,p,6} * C_{CD,p} - k_{in} * V_{CD,p} * C_{CD,p}$$

$$M_{CB6y} * V_{CB6y} \cdot ve = \text{Йб}_{кб65} * C_{BE6y} + \text{Лшт} * M_{CB63} * C_{CB63} - \text{Йб}_{кб66} * C_{CB6y} - \text{Лщге} * M_{CB6y} * C_{CB6y}$$

$$V_{CD,cell} * dC_{CD,cell} / dt = fb * PS_{r,CD,difinf} * C_{CD,p} + fu * PS_{u,CD,difinf} * C_{CD,u} - fc * PS_{r,CD,difeff} * C_{CD,cell} -$$

$$fc * PS_{u,CD,difeff} * C_{CD,cell}$$

$$V_{CD,u} * dC_{CD,u} / dt = Q_{u,5} * C_{DT,u} + fc * PS_{u,CD,difeff} * C_{CD,cell} - fu * PS_{u,CD,difinf} * C_{CD,cell} - Q_{u,6} * C_{CD,u}$$

## Urine compartment

$$dX_{urine} / dt = Q_{u,6} * C_{CD,u}$$

## Other equations

Plasma and erythrocyte flow in each compartment (t: compartment name)

$$Q_{t,p} = Q_t * (1 - He)$$

$$Q_{t,e} = Q_t * He$$

$$Q_{r,1} = Q_r - Q_{GFR}$$

$$Q_{r,2} = Q_{r,1} + (Q_{u,1} - Q_{u,2}),$$

$$Q_{r,3} = Q_{r,2} + (Q_{u,2} - Q_{u,3}),$$

$$Q_{r,4} = Q_{r,3} + (Q_{u,3} - Q_{u,4}),$$

$$Q_{r,5} = Q_{r,4} + (Q_{u,4} - Q_{u,5}),$$

$$Q_{r,6} = Q_r - Q_{u,6},$$

$$V_{\text{plasma}} = (1 - \text{He}) * V_{\text{blood}},$$

$$V_{\text{erythro}} = \text{He} * V_{\text{blood}},$$

$$V_{\text{EH,p}} = (1 - \text{He}) * V_{\text{EH}},$$

$$V_{\text{EH,e}} = \text{He} * V_{\text{EH}},$$

$$V_{\text{muscle,p}} = (1 - \text{He}) * (0.026 + 0.12) * V_{\text{muscle}} + 0.854 * V_{\text{muscle}},$$

$$V_{\text{muscle,e}} = \text{He} * (0.026 + 0.12) * V_{\text{muscle}},$$

$$V_{\text{skin,p}} = (1 - \text{He}) * (0.019 + 0.302) * V_{\text{skin}} + 0.679 * V_{\text{skin}},$$

$$V_{\text{skin,e}} = \text{He} * (0.019 + 0.302) * V_{\text{skin}},$$

$$V_{\text{adipose,p}} = (1 - \text{He}) * (0.01 + 0.135) * V_{\text{adipose}} + 0.855 * V_{\text{adipose}},$$

$$V_{\text{adipose,e}} = \text{He} * (0.01 + 0.135) * V_{\text{adipose}},$$



$$V_{r,p} = 0.30 \cdot (1 - H_e) \cdot V_{renal},$$

$$V_{r,e} = 0.30 \cdot H_e \cdot V_{renal}$$

$$V_{r,cell} = 0.24 \cdot V_{renal},$$

$$V_{r,urine} = 0.46 \cdot V_{renal},$$

$$V_{G,p} = 5/129 \cdot V_{r,p},$$

$$V_{PT,p} = 17/129 \cdot V_{r,p},$$

$$V_{DT,p} = 11/129 \cdot V_{r,p},$$

$$V_{CD,p} = 62/129 \cdot V_{r,p},$$

$$V_{G,u} = 5/129 \cdot V_{r,urine}$$

$$V_{PT,u} = 17/129 \cdot V_{r,urine}$$

$$V_{DT,u} = 11/129 \cdot V_{r,urine}$$

$$V_{CD,u} = 62/129 \cdot V_{r,urine}$$

$$V_{PT,cell} = 17/124 \cdot V_{r,cell},$$

$$V_{DT,cell} = 11/124 \cdot V_{r,cell},$$

$$V_{CD,cell} = 62/124 \cdot V_{r,cell},$$

$$V_{G,e} = 5/129 \cdot V_{r,e},$$

$$V_{PT,e} = 17/129 \cdot V_{r,e},$$

$$V_{DT,e} = 11/129 \cdot V_{r,e},$$

$$V_{CD,e} = 62/129 * V_{r,e},$$

$$N_h = z * V_{olt\_h} * F / (R * T),$$

$$E_{N_h} = \exp(N_h),$$

$$N_{upt} = z * V_{olt\_upt} * F / (R * T),$$

$$E_{N_{upt}} = \exp(N_{upt}),$$

$$N_{udt} = z * V_{olt\_udt} * F / (R * T),$$

$$E_{N_{udt}} = \exp(N_{udt}),$$

$$N_{ucd} = z * V_{olt\_ucd} * F / (R * T),$$

$$E_{N_{ucd}} = \exp(N_{ucd}),$$

$$N_{vpt} = z * V_{olt\_vpt} * F / (R * T),$$

$$E_{N_{vpt}} = \exp(N_{vpt}),$$

$$N_{vdt} = z * V_{olt\_vdt} * F / (R * T),$$

$$E_{N_{vdt}} = \exp(N_{vdt}),$$

$$N_{vcd} = z * V_{olt\_vcd} * F / (R * T),$$

$$E_{N_{vcd}} = \exp(N_{vcd}),$$

$$K_{m\_met\_OCT1} = K_{m\_met\_OCT1\_uM} * MW,$$

$$K_{m\_met\_OCT2} = K_{m\_met\_OCT2\_uM} * MW,$$

$$K_{m\_met\_MATE} = K_{m\_met\_MATE\_uM} * MW,$$

$$PS_{h,act} = 1 / (1 + R_{dif}) * CL_{intall} / \beta_{liver},$$

$$PS_{h,difin} = PS_{h,act} * R_{dif},$$

$$PS_{h,difout} = PS_{h,difin} / \gamma_h,$$

$$CL_{met} = CL_{intall} / (1 - \beta_{liver} * R_{dif} / (1 + R_{dif})) / \gamma_h,$$

$$V_{max\_met\_OCT1} = PS_{h,act} * K_{m\_met\_OCT1},$$

$$PS_{r,PT,difinf} = Pd * SA_{r,PT} * 1000 * N_{vpt} / (EN_{vpt} - 1),$$

$$PS_{u,PT,difinf} = Pd * SA_{u,PT} * 1000 * N_{upt} / (EN_{upt} - 1),$$

$$PS_{u,PT,difeff} = PS_{u,PT,difinf} / \gamma_{u,PT},$$

$$PS_{r,PT,difeff} = PS_{r,PT,difinf} / \gamma_{r,PT},$$

$$PS_{MATE} = PS_{u,PT,difeff} * R_{MATE} / dif,$$

$$V_{max,MATE} = PS_{MATE} * K_{m,MATE}$$

$$PS_{OCT2} = ((R_{MATE} / dif + 1) * PS_{u,PT,difeff} * (1 - \beta_{kidney}) / \beta_{kidney} - PS_{r,PT,difeff}) * R_{OCT2,inf/eff} / EN_{vpt},$$

$$V_{max,OCT2} = PS_{OCT2} * K_{m,OCT2}$$

$$PS_{r,DT,difinf} = Pd * SA_{r,DT} * 1000 * Nvdt / (ENvdt - 1),$$

$$PS_{r,CD,difinf} = Pd * SA_{r,CD} * 1000 * Nvcd / (ENvcd - 1),$$

$$PS_{u,CD,difinf} = Pd * SA_{u,DT} * 1000 * Nudt / (ENudt - 1),$$

$$PS_{u,CD,difinf} = Pd * SA_{u,CD} * 1000 * Nucd / (ENucd - 1),$$

$$PS_{r,DT,dieff} = PS_{r,DT,difinf} / \gamma_{r,DT},$$

$$PS_{u,CD,dieff} = PS_{u,DT,difinf} / \gamma_{u,DT},$$

$$PS_{r,CD,dieff} = PS_{r,CD,difinf} / \gamma_{r,CD},$$

$$PS_{u,CD,dieff} = PS_{u,CD,difinf} / \gamma_{u,CD},$$

## Model equations for cimetidine

### Central plasma compartment

$$V_{\text{blood}} \cdot dC_{\text{blood}}/dt = Q_h \cdot C_{\text{EH}} + Q_{r6} \cdot C_{r6} - Q_h \cdot C_{\text{blood}} - Q_{r,p} \cdot C_{\text{plasma}} - Q_{\text{muscle}} \cdot (C_{\text{blood}} - C_{\text{muscle}}/K_{p,\text{muscle}}) - Q_{\text{skin}} \cdot (C_{\text{blood}} - C_{\text{skin}}/K_{p,\text{skin}}) - Q_{\text{adipose}} \cdot (C_{\text{blood}} - C_{\text{adipose}}/K_{p,\text{adipose}})$$

### Distribution compartments

$$V_{\text{muscle}} \cdot dtC_{\text{muscle}}/dt = (Q_{\text{muscle}} \cdot C_{\text{blood}} - Q_{\text{muscle}} \cdot C_{\text{muscle}}/K_{p,\text{muscle}})$$

$$V_{\text{skin}} \cdot dtC_{\text{skin}}/dt = (Q_{\text{skin}} \cdot C_{\text{blood}} - Q_{\text{skin}} \cdot C_{\text{skin}}/K_{p,\text{skin}})$$

$$V_{\text{adipose}} \cdot dtC_{\text{adipose}}/dt = (Q_{\text{adipose}} \cdot C_{\text{blood}} - Q_{\text{adipose}} \cdot C_{\text{adipose}}/K_{p,\text{adipose}})$$

### Intestinal compartments

$$dX_{\text{intestine}} / dt = -ka/FaFg \cdot X_{\text{intestine}}$$

### Extracellular hepatic compartments

$$V_{\text{EH}} \cdot dC_{\text{EH}} / dt = ka \cdot X_{\text{intestine}} + Q_h \cdot (C_{\text{blood}} - C_{\text{EH}}) + fh \cdot PS_{\text{dif,eff}} \cdot C_{\text{HC}} -$$

$$(V_{\text{max\_met\_OCT1}} \cdot (C_{\text{EH},p,i} / (K_{\text{m\_met\_OCT1}} + C_{\text{EH},p,i})) - C_{\text{HC},i} \cdot e^{N_h} / R_{\text{OCT1,inf/eff}} / (K_{\text{m\_met\_OCT1}} + C_{\text{HC},i})) / 5 -$$

$$fu \cdot (PS_{\text{dif,inf}} + PS_{\text{act\_inf}}) \cdot C_{\text{EH}} / R_b$$

### Hepatocyte compartments

$$V_{HC} * dC_{HC} / dt = fu * (PS_{dif,inf} + PS_{act,inf}) * C_{EH} / Rb - fh * PS_{dif,eff} * C_{HC} - fh * CL_{int,met} * C_{HC}; (i=1 \sim 5)$$

### Extracellular glomerulus compartment

$$V_{r,1} * dC_{r1} / dt = Q_r * C_{blood} - Q_{r1} * C_{r1} - fu * Q_{u1} * C_{r,1} / Rb$$

### Glomerulus compartment

$$V_G * dC_G / dt = Q_{GFR} * (fu * C_{r,1} / Rb - C_G)$$

### Kidney: Proximal tubule (i=1~3)

$$(V_{PT,i} / 3) * dC_{PT,r,i} / dt = Q_{r,i} * C_{r,i} + fc * 1/3 * PS_{r,PT,dif,eff} * C_{PT,cell,i} - 1/3 * V_{max\_OCT2} * ((fu * f_{PT,ion\_b} * C_{PT,r,i} / Rb) / (K_{m\_OCT2} + (fu * f_{ion\_b} * C_{PT,r,i} / Rb))) - fc * f_{ion\_c} * C_{PT,cell,i} * \exp(Nvpt) / R_{OCT2,inf/eff} / (K_{m\_OCT2} + fc * f_{ion\_c} * C_{PT,cell,i}) - 1/3 * V_{max\_OAT3} * ((fu * f_{ion\_b} * C_{PT,r,i} / Rb) / (K_{m\_OAT3} + (fu * f_{ion\_b} * C_{PT,r,i} / Rb))) - 1/3 * PS_{r,PT,dif,inf} * fu * C_{PT,r,i} / Rb - Q_{r(i+1)} * C_{PT,r,i}$$

$$(V_{PT,c}/3) * dC_{PT,cell,i}/dt = f_b * 1/3 * V_{max\_OCT2} * (f_u * f_{ion\_b} * C_{PT,r,i}/R_b) / (K_{m\_OCT2} + f_u * f_{ion\_b} * C_{PT,r,i}/R_b) -$$

$$f_c * f_{PT,ion\_c} * C_{PT,cell,i} * \exp(Nvpt) / R_{OCT2,inf/eff} / (K_{m\_OCT2} + f_c * f_{ion\_c} * C_{PT,cell,i}) + 1/3 * V_{max\_OAT3} *$$

$$((f_u * f_{ion\_b} * C_{PT,r,i}/R_b) / (K_{m\_OAT3} + (f_u * f_{ion\_b} * C_{PT,r,i}/R_b))) + 1/3 * PS_{r,PT,difinf} * f_u * C_{PT,r,i}/R_b +$$

$$f_u * 1/3 * PS_{u,PT,difinf} * C_{PT,u,i} - f_c * 1/3 * PS_{r,PT,difeff} * C_{PT,cell,i} - f_c * 1/3 * (f_{ion\_u} * V_{max,MATE} / (K_{m,MATE} + f_c$$

$$* f_{PT,ion\_u} * C_{PT,cell,i}) + PS_{u,PT,difeff} * C_{PT,cell,i}$$

$$(V_{PT,u}/3) * dC_{PT,u,i}/dt = Q_{u1} * C_{PT,cell,i} + f_c * 1/3 * (f_{PT,ion\_u} * V_{max,MATE} / (K_{m,MATE} + f_c * f_{PT,ion\_u} * C_{PT,cell,i}))$$

$$+ PS_{u,PT,difeff} * C_{PT,cell,i} - f_u * 1/3 * PS_{u,PT,difinf} * C_{PT,u,i} - Q_{u2} * C_{PT,u,i}$$

### Distal tubule compartment

$$V_{DT,r} * dC_{DT}/dt = Q_{r4} * C_{PT,3} + f_c * PS_{r,dt,difeff} * C_{DT,cell} - f_u * PS_{r,DT,difinf} * C_{DT}/R_b - Q_{r5} * C_{DT}$$

$$V_{DT,cell} * dC_{DT,cell}/dt = f_u * PS_{r,DT,difinf} * C_{DT}/R_b + f_u * PS_{u,DT,difinf} * C_{DT,u} - f_c * PS_{r,DT,difeff} * C_{DT,cell} -$$

$$f_c * PS_{u,DT,difeff} * C_{DT,cell}$$

$$V_{DT,u} * dC_{DT,u}/dt = Q_{u4} * C_{PT,u,3} + f_c * PS_{u,DT,difeff} * C_{DT,cell} - f_u * PS_{u,DT,difinf} * C_{DT,u} - Q_{u5} * C_{DT,u}$$

### Collecting duct compartment

$$V_{CD,r} * dC_{CD}/dt = Q_{r5} * C_{dt,p} + f_c * PS_{r,CD,difeff} * C_{CD,cell} - f_u * PS_{r,CD,difinf} * C_{CD}/R_b - Q_{r6} * C_{CD,p}$$

$$V_{CD,cell} * dC_{CD,cell}/dt = fu * PS_{r,CD,difinf} * C_{CD}/Rb + fu * PS_{u,CD,difinf} * C_{CD,u} - fc * PS_{r,CD,difeff} * C_{CD,cell} -$$

$$fc * PS_{u,CD,difeff} * C_{CD,cell}$$

$$V_{CD,u} * dC_{CD,u}/dt = Qu5 * C_{DT,u} + fc * PS_{u,CD,difeff} * C_{CD,cell} - fu * PS_{u,CD,difinf} * C_{CD,cell} - Qu6 * C_{CD,u}$$

### Urine compartment

$$dX_{urine}/dt = Qu6 * C_{CD,u}$$

### Other calculations

$$Q_{r1} = Q_r - Q_{u1},$$

$$Q_{r2} = Q_{r1} + ((Q_{u1} - Q_{u6})/5),$$

$$Q_{r3} = Q_{r2} + ((Q_{u1} - Q_{u6})/5),$$

$$Q_{r4} = Q_{r3} + ((Q_{u1} - Q_{u6})/5),$$

$$Q_{r5} = Q_{r4} + ((Q_{u1} - Q_{u6})/5),$$

$$Q_{r6} = Q_r - Q_{u6},$$

$$V_{r,blood} = 0.30 * V_{renal},$$

$$V_{r,cell} = 0.24 * V_{renal},$$

$$V_{r,urine} = 0.46 * V_{renal},$$



$$V_G = 5/129 * V_{r,blood},$$

$$V_{PT} = 17/129 * V_{r,blood},$$

$$V_{DT} = 11/129 * V_{r,blood},$$

$$V_{CD} = 62/129 * V_{r,blood},$$

$$V_{G,u} = 5/129 * V_{r,urine}$$

$$V_{PT,u} = 17/129 * V_{r,urine}$$

$$V_{DT,u} = 11/129 * V_{r,urine}$$

$$V_{CD,u} = 62/129 * V_{r,urine}$$

$$V_{PT,cell} = 17/124 * V_{r,cell},$$

$$V_{DT,cell} = 11/124 * V_{r,cell},$$

$$V_{CD,cell} = 62/124 * V_{r,cell},$$

$$PS_{dif\_inf} = R_{dif} * PS_{act\_inf},$$

$$PS_{dif\_eff} = PS_{dif\_inf} / \gamma_h,$$

$$f_{r,ion} = 1 / (1 + 10^{(pH_b - pK_{a_{cim}})}),$$

$$f_{r,union} = f_{r,ion} * 10^{(pH_b - pK_{a_{cim}})},$$

$$f_{c,ion} = 1 / (1 + 10^{(pH_c - pK_{a_{cim}})}),$$

$$f_{c,union} = f_{c,ion} * 10^{(pH_c - pKa_{cim})},$$

$$f_{u,ion,PT} = 1 / (1 + 10^{(pH_{PT,u} - pKa_{cim})}),$$

$$f_{u,union,PT} = f_{u,ion,PT} * 10^{(pH_{PT,u} - pKa_{cim})},$$

$$f_{u,ion,DT} = 1 / (1 + 10^{(pH_{DT,u} - pKa_{cim})}),$$

$$f_{u,union,DT} = f_{u,ion,DT} * 10^{(pH_{DT,u} - pKa_{cim})},$$

$$f_{u,ion,CD} = 1 / (1 + 10^{(pH_{CD,u} - pKa_{cim})}),$$

$$f_{u,union,CD} = f_{u,ion,CD} * 10^{(pH_{CD,u} - pKa_{cim})},$$

$$N_{u,PT} = z * Volt_{u,PT} * F / (R * T),$$

$$N_{u,DT} = z * Volt_{u,DT} * F / (R * T),$$

$$N_{u,CD} = z * Volt_{u,CD} * F / (R * T),$$

$$N_{r,PT} = z * Volt_{r,PT} * F / (R * T),$$

$$N_{r,DT} = z * Volt_{r,DT} * F / (R * T),$$

$$N_{r,CD} = z * Volt_{r,CD} * F / (R * T),$$

$$Pd_{union} = Pd / (f_{r,ion} * \lambda + f_{r,union}),$$

$$Pd_{ion} = Pd_{union} * \lambda,$$

$$PS_{r,PT,difin,union} = Pd_{union} * SA_{r,PT} * 1000,$$

$$PS_{r,PT,difinf,ion} = Pd_{ion} * SA_{r,PT} * 1000 * N_{r,PT} / (\exp(N_{r,PT}) - 1),$$

$$PS_{r,PT,difinf} = PS_{r,PT,difinf,union} * f_{r,union} + PS_{r,PT,difinf,ion} * f_{r,ion},$$

$$\gamma_{r,1} = (\lambda * f_{r,ion} + f_{r,union}) / (\exp(N_{r,PT}) * \lambda * f_{c,ion} + f_{c,union}),$$

$$PS_{r,PT,difeff} = PS_{r,PT,difinf} / \gamma_{r,1},$$

$$PS_{u,PT,difinf,union} = Pd_{union} * SA_{u,PT} * 1000,$$

$$PS_{u,PT,difinf,ion} = Pd_{ion} * SA_{u,PT} * 1000 * N_{u,PT} / (\exp(N_{u,PT}) - 1),$$

$$PS_{u,PT,difinf} = PS_{u,PT,difinf,union} * f_{u,union} + PS_{u,PT,difinf,ion} * f_{u,ion},$$

$$\gamma_{u,1} = (\lambda * f_{u,ion} + f_{u,union}) / (\exp(N_{u,PT}) * \lambda * f_{c,ion} + f_{c,union}),$$

$$PS_{u,PT,difeff} = PS_{u,PT,difinf} / \gamma_{u,1},$$

$$PS_{r,DT,difinf,union} = Pd_{union} * SA_{r,DT} * 1000,$$

$$PS_{r,DT,difinf,ion} = Pd_{ion} * SA_{r,DT} * 1000 * N_{r,DT} / (\exp(N_{r,DT}) - 1),$$

$$PS_{r,DT,difinf} = PS_{r,DT,difinf,union} * f_{r,union} + PS_{r,DT,difinf,ion} * f_{r,ion},$$

$$\gamma_{r,2} = (\lambda * f_{r,ion} + f_{r,union}) / (\exp(N_{r,DT}) * \lambda * f_{c,ion} + f_{c,union}),$$

$$PS_{r,DT,difeff} = PS_{r,DT,difinf} / \gamma_{r,2},$$

$$PS_{u,DT,difinf,union} = Pd_{union} * SA_{u,DT} * 1000,$$

$$PS_{u,DT,difinf,ion} = Pd_{ion} * SA_{u,DT} * 1000 * N_{u,DT} / (\exp(N_{u,DT}) - 1),$$

$$PS_{u,DT,difinf} = PS_{u,DT,difinf,union} * f_{u,union} + PS_{u,DT,difinf,ion} * f_{u,ion},$$

$$\gamma_{u,2} = (\lambda * f_{u,ion} + f_{u,union}) / (\exp(N_{u,DT}) * \lambda * f_{c,ion} + f_{c,union}),$$

$$PS_{u,DT,difeff} = PS_{u,DT,difinf} / \gamma_{u,2},$$

$$PS_{r,CD,difinf,union} = Pd_{union} * SA_{r,CD} * 1000,$$

$$PS_{r,CD,difinf,ion} = Pd_{ion} * SA_{r,CD} * 1000 * N_{r,CD} / (\exp(N_{r,CD}) - 1),$$

$$PS_{r,CD,difinf} = PS_{r,CD,difinf,union} * f_{r,union} + PS_{r,CD,difinf,ion} * f_{r,ion},$$

$$\gamma_{r,3} = (\lambda * f_{r,ion} + f_{r,union}) / (\exp(N_{r,CD}) * \lambda * f_{c,ion} + f_{c,union}),$$

$$PS_{r,CD,difeff} = PS_{r,CD,difinf} / \gamma_{r,3},$$

$$PS_{u,CD,difinf,union} = Pd_{union} * SA_{u,CD} * 1000,$$

$$PS_{u,CD,difinf,ion} = Pd_{ion} * SA_{u,CD} * 1000 * N_{u,CD} / (\exp(N_{u,CD}) - 1),$$

$$PS_{u,CD,difinf} = PS_{u,CD,difinf,union} * f_{u,union} + PS_{u,CD,difinf,ion} * f_{u,ion},$$

$$\gamma_{u,3} = (\lambda * f_{u,ion} + f_{u,union}) / (\exp(N_{u,CD}) * \lambda * f_{c,ion} + f_{c,union}),$$

$$PS_{u,CD,difeff} = PS_{u,CD,difinf} / \gamma_{u,3},$$

$$K_{m,OCT2} = K_{m,OCT2,uM} * MW * f_u * f_{r,ion},$$

$$V_{\max, \text{OCT2}} = V_{\max, \text{OCT2, uM}} * MW * fu * f_{r, \text{ion}},$$

$$K_{m, \text{OAT3}} = K_{m, \text{OAT3, uM}} * MW * fu * f_{r, \text{ion}},$$

$$V_{\max, \text{OAT3}} = V_{\max, \text{OAT3, uM}} * MW * fu * f_{r, \text{ion}},$$

$$K_{m, \text{MATE}} = K_{m, \text{MATE, uM}} * MW * fc * f_{c, \text{ion}},$$

$$V_{\max, \text{MATE}} = V_{\max, \text{MATE, uM}} * MW * fc * f_{c, \text{ion}},$$
